# Supplementary material
Source: PubMed Central journal article supplement (PMC5740239)
Supplement: BPH-175-38-s001.pdf [file BPH-175-38-s001.pdf]

Supplementary Figures

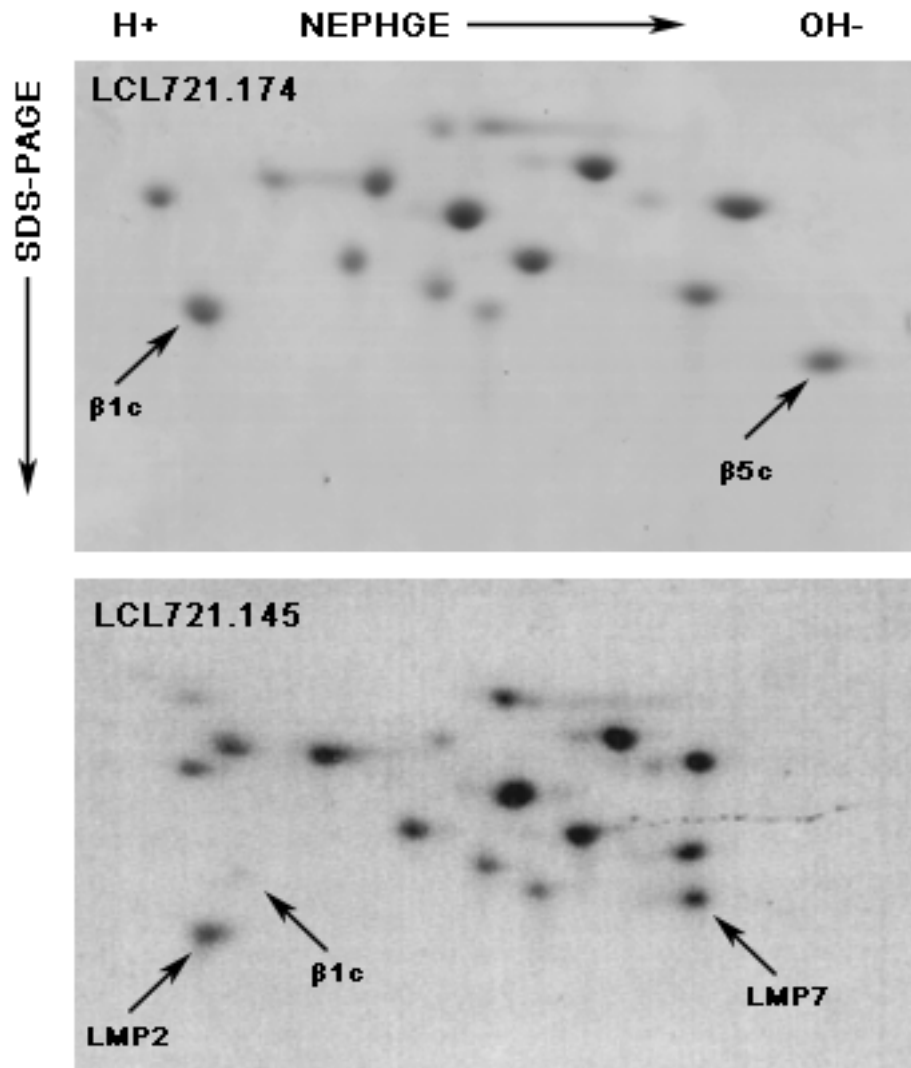

**Supplementary Figure 1. Proteasome composition of LCL721.174 cells and LCL721.145 cells**

NEPHGE/SDS-PAGE analysis of 70  $\mu$ g 20S proteasome purified from LCL721.174 cells (CP) (top) LCL721.145 cells (IP) (bottom). The proteins were visualized by coomassie stain. The positions of proteasome subunits LMP2, LMP7,  $\beta 1c$ , and  $\beta 5c$  are indicated.

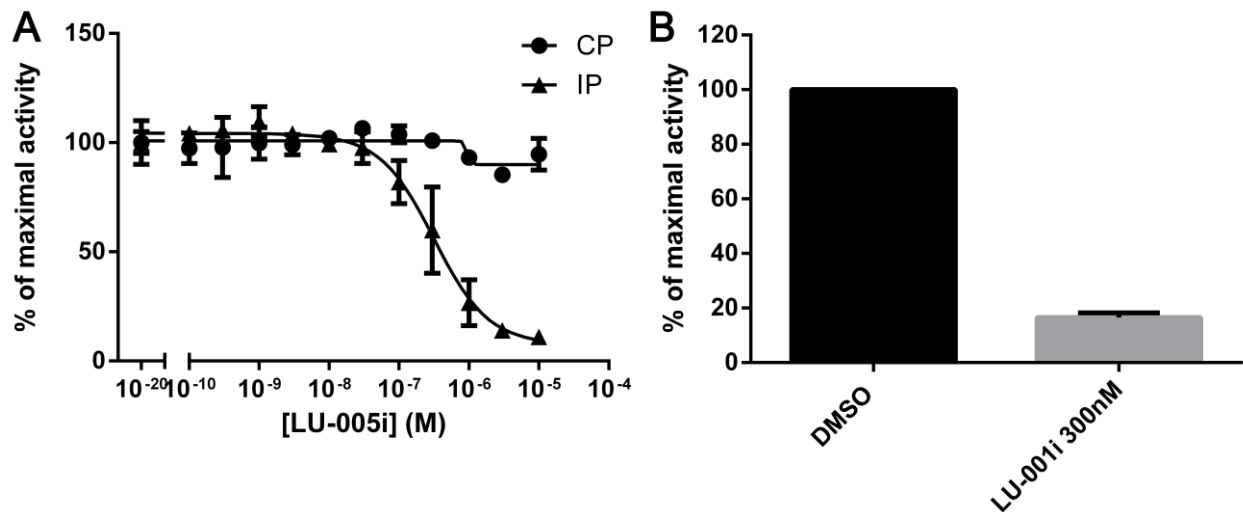

### Supplementary Figure 2. Cell permeability of LU-005i and LU-001i

(A) LCL721.174 cells (CP) or LCL721.145 cells (IP) were treated with the indicated concentrations of LU-005i. The chymotrypsin-like activity in the cells was determined by the hydrolysis of the cell permeable substrate Meo-Suc-GLF-AMC. Depicted is the mean  $\pm$  SD % of maximal activity of triplicate cultures. The highest fluorescence value was set to 100%. (B) LCL721.145 (contain IP) cells were incubated with 300 nM LU-001i or DMSO overnight. Proteasomes of crude lysates of these cells were immunoprecipitated and assayed for the hydrolysis of the fluorogenic substrate Ac-PAL-AMC (LMP2-activity). Depicted is the mean  $\pm$  SD % of maximal activity of triplicate cultures. The highest fluorescence value was set to 100%. Experiments were performed twice with a similar outcome. These experiments were only performed to demonstrate the cell permeability of LU-005i and LU-001i. Therefore, the data were not statistically analyzed.

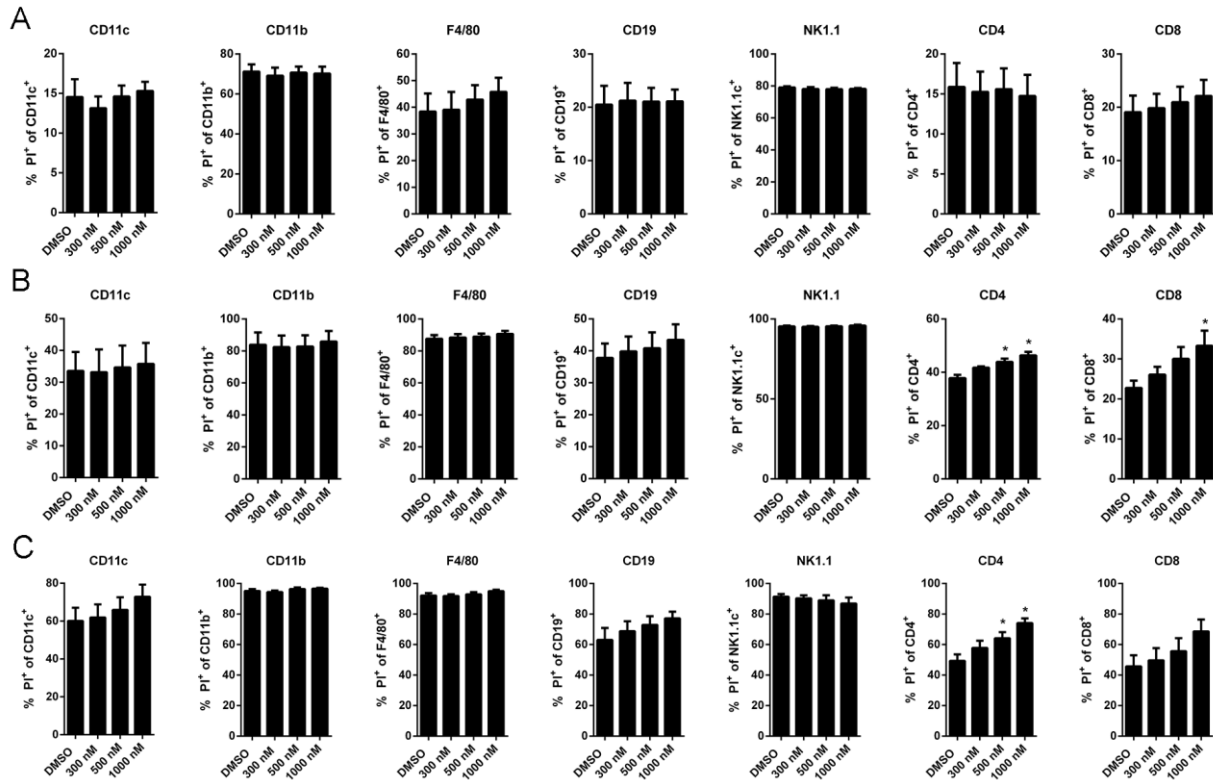

### Supplementary Figure 3. Effect of LU-005i on cell death

Splenocytes derived from C57BL/6 mice were treated with DMSO, 300 nM LU-005i, 500 nM LU-005i, or 1000 nM LU-005i for 24 h (A), 48 h (B), or 72 h (C). Cell death (PI<sup>+</sup>) of CD11c<sup>+</sup>, CD11b<sup>+</sup>, F4/80<sup>+</sup>, CD19<sup>+</sup>, NK1.1<sup>+</sup>, CD4<sup>+</sup>, and CD8<sup>+</sup> was analysed by flow cytometry. Shown are the means of PI<sup>+</sup> populations  $\pm$  SEM from splenocytes derived from 5 different mice (n=5). All data were statistically compared to the DMSO treated group. \*p < 0.05.

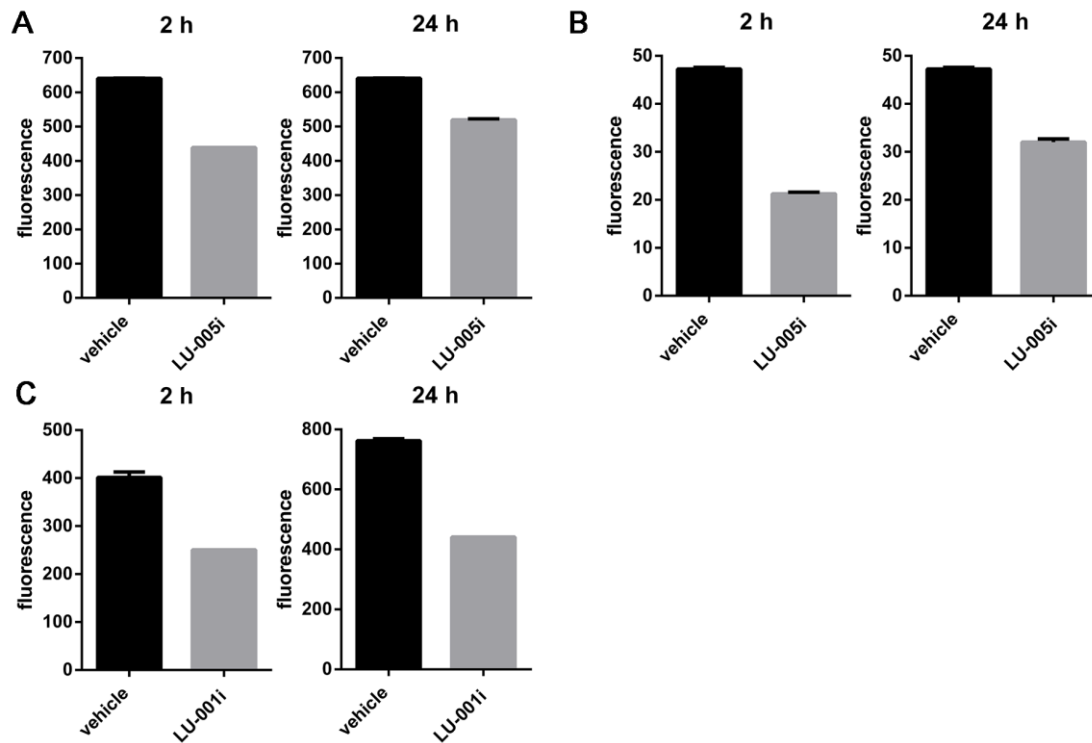

#### Supplementary Figure 4. Activity of LU-005i and LU-001i in mice

C57BL/6 mice were treated with LU-005i (A, B) (15 mg/kg), LU-001i (C) (15 mg/kg), or vehicle for 2 h or 24 h. Proteasomes of crude lysates of splenocytes derived from these mice were immunoprecipitated and assayed for the hydrolysis of the fluorogenic substrate Ac-PAL-AMC (LMP2-activity) (A, C) or Suc-LLVY-AMC (chymotrypsin-like activity) (B). Depicted is the mean  $\pm$  SD of the fluorescence of two mice per group measured in duplicates. Experiments were performed twice with a similar outcome. These experiments were only performed to demonstrate the activity of LU-005i and LU-001i in mice. Therefore, the data were not statistically analyzed.
